# Supplementary material for: Intrauterine Zika virus infection of pregnant immunocompetent mice models transplacental transmission and adverse perinatal outcomes
Source: PubMed Central journal article supplement (PMC5321801; doi:10.1038/ncomms14575), 2017-02-21
Supplement: ncomms14575-s1.pdf [file ncomms14575-s1.pdf]

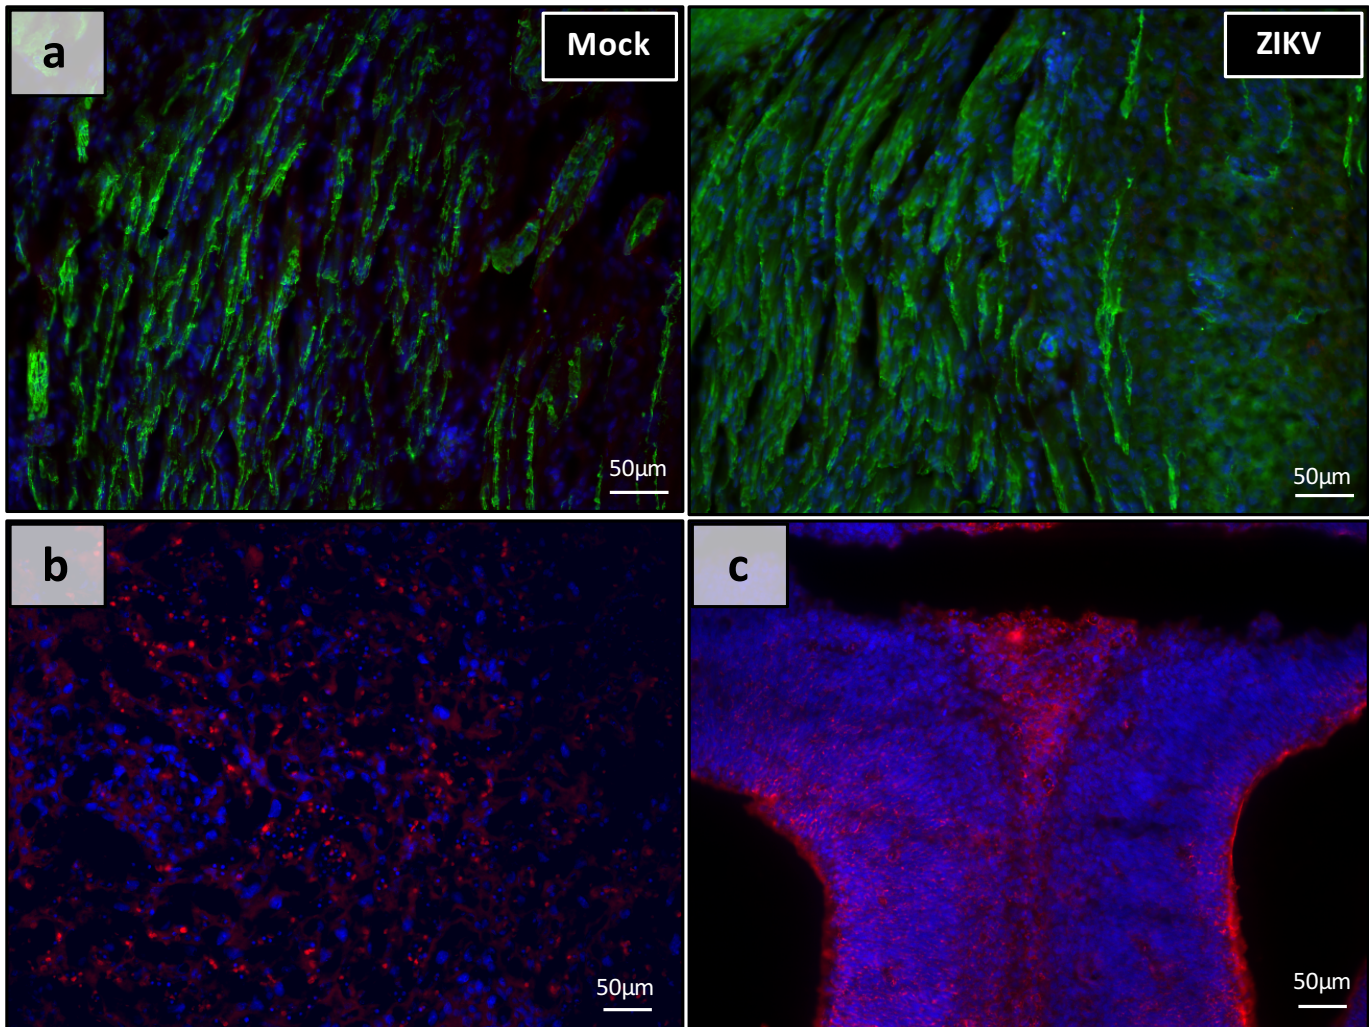

**Supplementary Figure 1. ZIKV antigen in the uterine myometrium, placenta, and fetal brain.** Pregnant CD1 dams underwent a mini-laparotomy in the lower abdomen for intrauterine (IU) inoculation of ZIKV (1968 Nigeria) or vehicle at embryonic day 10. Uterine horns were harvested 48 hours post-inoculation (hpi) and placentas and fetal brains were harvested 96 hpi for immunohistochemical analysis. (a) Fluorescent immuno-staining of ZIKV (red) and  $\alpha$ -actin (green) with 4'6-diamidino-2-phenylindole (DAPI, blue) to label nuclei in mock-infected (left panel) and infected (right panel) uterine horns. (b) Fluorescent immuno-staining of ZIKV (red) with 4'6-diamidino-2-phenylindole (DAPI, blue) to label nuclei in infected placentas collected 96 hpi. (c) Fluorescent immuno-staining of ZIKV (red) with 4'6-diamidino-2-phenylindole (DAPI, blue) to label nuclei in infected fetal brains collected 96 hpi. Scale bar, 50  $\mu$ m.
